# Supplementary material
Source: PubMed Central journal article supplement (PMC10512165)

## Supplementary Online Content

Lee H, Huang KP, Mostaghimi A, Choudhry NK. Treatment patterns for alopecia areata in the US. *JAMA Dermatol*. Published online September 20, 2023.  
doi:10.1001/jamadermatol.2023.3109

**eTable 1.** Classification of Alopecia Areata Treatments Utilized in Insurance Claims Analyses

**eTable 2.** Assigned Days of Supply for Treatment Groups Specified in Sankey Plot

**eFigure.** Flowchart of the Study Population Selection

This supplementary material has been provided by the authors to give readers additional information about their work.

**eTable1. Classification of Alopecia Areata Treatments Utilized in Insurance Claims Analyses**

| <b>Alopecia Areata Treatments</b>                               | <b>Definition</b>                                                                                                                                                                                                                          |
|-----------------------------------------------------------------|--------------------------------------------------------------------------------------------------------------------------------------------------------------------------------------------------------------------------------------------|
| Intralesional steroid                                           | <b>HCPCS:</b> 11900, 11901                                                                                                                                                                                                                 |
| Topical steroid                                                 | <b>Generic name:</b> clobetasol, halobetasol, fluocinonide, diflorasone, desoximetasone, clocortolone, triamcinolone, betamethasone, fluocinolone, prednicarbate, hydrocortisone, alclometasone<br><b>Route of administration:</b> topical |
| Intramuscular steroid                                           | <b>HCPCS:</b> J3301                                                                                                                                                                                                                        |
| Oral steroid                                                    | <b>Generic name:</b> methylprednisolone, dexamethasone, prednisolone, prednisone<br><b>Route of administration:</b> oral                                                                                                                   |
| Topical tacrolimus/pimecrolimus                                 | <b>Generic name:</b> tacrolimus, pimecrolimus<br><b>Brand name:</b> elidel, protopic<br><b>Route of administration:</b> topical                                                                                                            |
| Cyclosporine, methotrexate, mycophenolate mofetil, azathioprine | <b>Generic name:</b> cyclosporine, methotrexate, mycophenolate mofetil, azathioprine                                                                                                                                                       |
| Oral JAK inhibitors                                             | <b>Generic name:</b> tofacitinib, ruxolitinib, baricitinib,<br><b>Brand name:</b> Xeljanz, Jakafi, Olumiant<br><b>NDC:</b> 00069100101, 00069050114, 00069050130, 50881000560, 50881001060, 50881001560, 50881002060, 50881002560,         |
| Simvastatin/ezetimibe                                           | <b>Generic name:</b> ezetimibe/simvastatin                                                                                                                                                                                                 |
| DPCP                                                            | <b>HCPCS:</b> 95165                                                                                                                                                                                                                        |
| Narrowband UVB                                                  | <b>HCPCS:</b> 96900, 96910                                                                                                                                                                                                                 |
| Excimer laser                                                   | <b>HCPCS:</b> 96921, 96922                                                                                                                                                                                                                 |

**Abbreviations:** DPCP, Diphenylcyclopropenone; HCPCS, Healthcare Common Procedure Coding System; JAK, Janus kinase; NDC, National Drug Code; UVB, Ultraviolet B

**eTable 2. Assigned days of supply for treatment groups specified in Sankey plot**

| <b>Drug</b>           | <b>Days of supply</b>        |
|-----------------------|------------------------------|
| JAK inhibitor         | Same as total days dispensed |
| Topical steroid       | 30 days per order            |
| Oral steroid          | Same as total days dispensed |
| Excimer laser         | 14 days per treatment        |
| Intralesional steroid | 14 days per treatment        |
| Simvastatin/ezetimibe | Same as total days dispensed |
| Topical immunotherapy | 14 days per treatment        |
| Intramuscular steroid | 14 days per administration   |

**Abbreviations:** JAK, Janus kinase

**eFigure 1. Flowchart of the Study Population Selection**

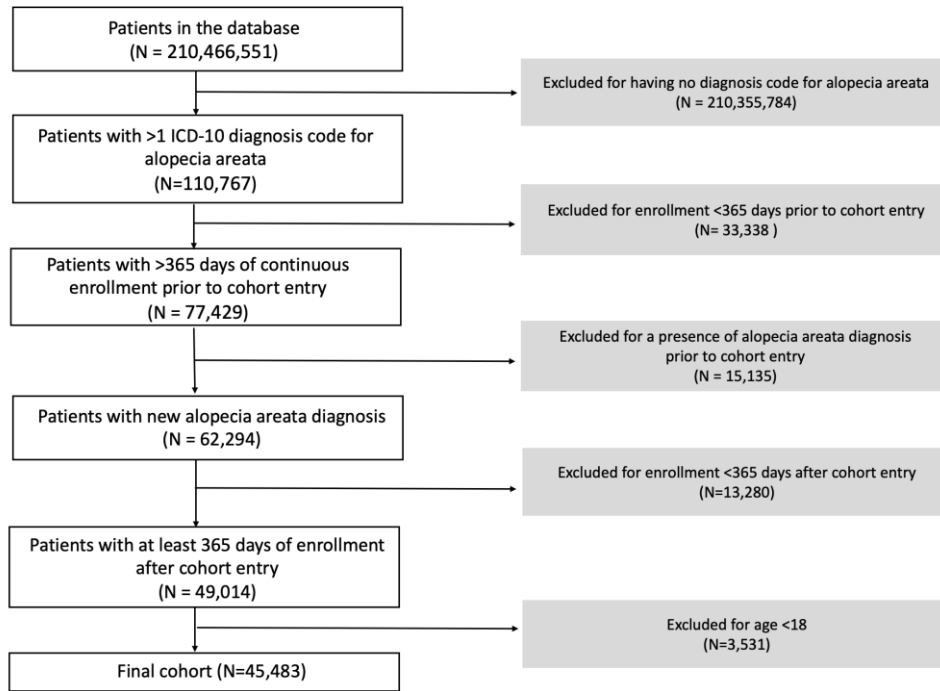

Supplement: jamadermatol-e233109-s001.pdf [file jamadermatol-e233109-s001.pdf]
