# Supplementary material
Source: PubMed Central journal article supplement (PMC10512165)
Supplement: jamadermatol-e233109-s002.pdf [file jamadermatol-e233109-s002.pdf]

## **Data Sharing Statement**

Lee. Treatment Patterns for Alopecia Areata in the US. *JAMA Dermatol*. Published September 20, 2023. doi:10.1001/jamadermatol.2023.3109

### **Data**

**Data available:** No
